# Supplementary material for: Life Cycle Assessment of the Sustainability of Enhancing the Photodegradation Activity of TiO2 with Metal-Doping
Source: MDPI journal article supplement (doi:10.3390/ma13071487), 2020-03-25
Supplement: s1 [file s1]

# Life Cycle Assessment of the Sustainability of Enhancing the Photodegradation Activity of TiO<sub>2</sub> with Metal-Doping

Sónia Fernandes <sup>1</sup>, Joaquim C.G. Esteves da Silva <sup>1,2</sup> and Luís Pinto da Silva <sup>1,2,\*</sup>

<sup>1</sup> Chemistry Research Unit (CIQUP), Faculty of Sciences of University of Porto, R. Campo Alegre 697, 4169-007 Porto, Portugal

<sup>2</sup> LACOMEPHI, GreenUPorto, Department of Geosciences, Environmental and Territorial Planning, Faculty of Sciences of University of Porto, R. Campo Alegre 697, 4169-007 Porto, Portugal

\* Correspondence: luis.silva@fc.up.pt

## Materials used on synthesis procedures

All chemicals employed in this study were of analytic grade and used as received without further purifications.

So titanium (IV) isopropoxide (Ti(OCH(CH<sub>3</sub>)<sub>2</sub>)<sub>4</sub>; purity > 99.99%), isopropyl alcohol (purity of 99.99%), cobaltous (II) chloride hexahydrate (CoCl<sub>2</sub>·6H<sub>2</sub>O; purity of 99.99%), manganese (II) chloride tetrahydrate (MnCl<sub>2</sub>·4H<sub>2</sub>O; purity > 99%) and iron (III) nitrate nonahydrate (Fe(NO<sub>3</sub>)<sub>3</sub>·9H<sub>2</sub>O; purity > 98%) were purchased from Sigma Aldrich Chemicals (St. Louis, USA). On the other hand nickel (II) chloride hexahydrate (NiCl<sub>2</sub>·6H<sub>2</sub>O; purity > 97%) was acquired from Lobachimie and sodium hydroxide (NaOH; purity of 98%) from Fisher Scientific International Company (Hampton, USA).

## Data inventory

**Table S1.** Amount of materials used in this LCA for each photocatalyst.

|                                                      | TiO <sub>2</sub> | 1% Co-TiO <sub>2</sub> | 1% Ni-TiO <sub>2</sub> | 1% Mn-TiO <sub>2</sub> | 1% Fe-TiO <sub>2</sub> |
|------------------------------------------------------|------------------|------------------------|------------------------|------------------------|------------------------|
| TTIP                                                 | 3558.71 g        |                        | 3523.12 g              |                        |                        |
| ISO                                                  | 18,812.76 g      |                        | 18,624.61 g            |                        |                        |
| CoCl <sub>2</sub> ·6H <sub>2</sub> O                 | -                | 31.76 g                | -                      | -                      | -                      |
| NiCl <sub>2</sub> ·6H <sub>2</sub> O                 | -                | -                      | 31.95 g                | -                      | -                      |
| MnCl <sub>2</sub> ·4H <sub>2</sub> O                 | -                | -                      | -                      | 27.90 g                | -                      |
| Fe(NO <sub>3</sub> ) <sub>3</sub> ·9H <sub>2</sub> O | -                | -                      | -                      | -                      | 50.59 g                |
| NaOH                                                 | -                | 10.68 g                | 10.76 g                | 11.28 g                | 15 g                   |
| H <sub>2</sub> O                                     | 22,537.75 g      | 26,329.99 g            | 32,341.98 g            | 32,330.19 g            | 32,272.14 g            |
| TTIP dissolution                                     | 22,537.75 g      | 22,312.34 g            | 22,312.34 g            | 22,312.34 g            | 22,312.34 g            |
| Metal dissolution                                    | -                | 2010.13 mL             | 4992.19 mL             | 4982.14 mL             | 4959.80 mL             |
| NaOH dissolution                                     | -                | 2007.52 mL             | 5037.45 mL             | 5035.71 mL             | 5000 mL                |
| Electricity consumption                              | 16.47 kWh        |                        | 17.22 kWh              |                        |                        |
| Heating plate                                        | 1.25 kWh         | 2 kWh                  | 2 kWh                  | 2 kWh                  | 2 kWh                  |
| Centrifuge                                           | 0.219 kWh        | 0.219 kWh              | 0.219 kWh              | 0.219 kWh              | 0.219 kWh              |
| Oven                                                 | 15 kWh           | 15 kWh                 | 15 kWh                 | 15 kWh                 | 15 kWh                 |
| Photocatalyst produced                               | 1000 g           | 1000 g                 | 1000 g                 | 1000 g                 | 1000 g                 |

TTIP was introduced based on literature [27] because it was not included on database Ecoinvent. Thus, TTIP was named Titanium (IV) isopropoxide at plant (RER).

**Table S2.** Inputs introduced in Ecoinvent database to achieve titanium precursor. Based on [27].

| Reference Flow Amount: 1kg                                                     |           |                                                            |                       |
|--------------------------------------------------------------------------------|-----------|------------------------------------------------------------|-----------------------|
| Inventory Item                                                                 | Amount    | Other                                                      | Inventory Flow Source |
| Ammonia, liquid, at regional storehouse (RER)                                  | 0.12 kg   |                                                            | Ecoinvent             |
| Electricity, medium voltage, production RER, at grid (RER)                     | 0.82 MJ   | This value considered additional energy consumption        | Ecoinvent             |
| Isopropanol, at plant (RER)                                                    | 0.85 kg   |                                                            | Ecoinvent             |
| Titanium tetrachloride, at plant (RER)                                         | 0.67 kg   |                                                            | [27]                  |
| Transport, freight, rail (RER)                                                 | 0.98 t-km | This value considered 600 km of freight rail transport and | Ecoinvent             |
| Transport, lorry 16-32t, Euro3 (RER)                                           |           | 0.16 t-km 100 km of freight truck transport                | Ecoinvent             |
| Ammonium chloride, at plant (GLO)                                              | 0.38 kg   | Co-product                                                 | Ecoinvent             |
| Hydrochloric acid, from the reaction of hydrogen with chlorine, at plant (RER) | 0.23 kg   | Co-product                                                 | Ecoinvent             |

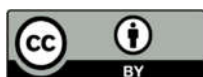

© 2020 by the authors. Submitted for possible open access publication under the terms and conditions of the Creative Commons Attribution (CC BY) license (<http://creativecommons.org/licenses/by/4.0/>).
